# Supplementary material for: The Establishment and Optimization of a Chicken Primordial Germ Cell Induction Model Using Small-Molecule Compounds
Source: MDPI journal article supplement (doi:10.3390/ani14020302), 2024-01-18
Supplement: s1 [file s1]

Supplementary Table S9 GO terms related to cAMP signaling pathway

| Id         | Term                                                             | pVal        | Gene                                                     |
|------------|------------------------------------------------------------------|-------------|----------------------------------------------------------|
| GO:0071320 | cellular response to cAMP                                        | 0.001817262 | AANAT; AKAP6; AQP1; AQP9<br>(part)                       |
| GO:0006198 | cAMP catabolic process                                           | 0.023045816 | PDE10A; PDE1A; PDE3B;<br>PDE8A; PDE8B                    |
| GO:0030818 | negative regulation of cAMP<br>biosynthetic process              | 0.025542455 | ADRA2A; GPR176                                           |
| GO:2000480 | negative regulation of cAMP-dependent<br>protein kinase activity | 0.026558105 | PKIA; PKIB; PKIG; PRKAR1B                                |
| GO:0004862 | cAMP-dependent protein kinase<br>inhibitor activity              | 0.053782414 | PKIA; PKIB; PKIG; PRKAR1B                                |
| GO:0019933 | cAMP-mediated signaling                                          | 0.085532556 | ADCY2; AKAP6; DGKQ;<br>RAPGEF3; RIMS2; SOX9              |
| GO:0030815 | negative regulation of cAMP metabolic<br>process                 | 0.086745573 | HTR1E                                                    |
| GO:0030822 | positive regulation of cAMP catabolic<br>process                 | 0.086745573 | RAPGEF3                                                  |
| GO:0051591 | response to cAMP                                                 | 0.129047475 | DGKQ; HNF4A; JUN; JUND;<br>PCK1; PTK2B; PTPRN            |
| GO:0030814 | regulation of cAMP metabolic process                             | 0.155908611 | DRD3; NPPC                                               |
| GO:0030816 | positive regulation of cAMP metabolic<br>process                 | 0.155908611 | RAMP2; RAMP3                                             |
| GO:0043951 | negative regulation of cAMP-mediated<br>signaling                | 0.18427156  | APLNR; LPAR1; PDE3B                                      |
| GO:2000479 | regulation of cAMP-dependent protein<br>kinase activity          | 0.20915181  | LOC100858796                                             |
| GO:0005222 | intracellular cAMP activated cation<br>channel activity          | 0.245629596 | HCN3; HCN4                                               |
| GO:0043949 | regulation of cAMP-mediated signaling                            | 0.245629596 | PDE10A; RASD2                                            |
| GO:0043950 | positive regulation of cAMP-mediated<br>signaling                | 0.257926279 | ADRB1; PCK1; UCN                                         |
| GO:0030552 | cAMP binding                                                     | 0.308163642 | BVES; HCN3; HCN4; PDE10A;<br>POPDC2; PRKAR1B;<br>RAPGEF3 |
| GO:0030819 | positive regulation of cAMP biosynthetic<br>process              | 0.414441037 | ADRB1; GPER1; VIP                                        |
| GO:0035497 | cAMP response element binding                                    | 0.460549541 | CREB3L3                                                  |
| GO:0005952 | cAMP-dependent protein kinase<br>complex                         | 0.460549541 | PRKAR1B                                                  |

---

|            |                                                     |             |              |
|------------|-----------------------------------------------------|-------------|--------------|
| GO:0008603 | cAMP-dependent protein kinase<br>regulator activity | 0.460549541 | PRKAR1B      |
| GO:0006171 | cAMP biosynthetic process                           | 0.997477652 | ADCY2; ADCY5 |

---
