# Supplementary material for: The Establishment and Optimization of a Chicken Primordial Germ Cell Induction Model Using Small-Molecule Compounds
Source: MDPI journal article supplement (doi:10.3390/ani14020302), 2024-01-18
Supplement: s1 [file s1]

## **Supplementary material**

### **Supplementary Figure legends**

**Supplementary Figure S1 Statistical analysis of G1/G2/S stage ratio during ESCs division.**

**Supplementary Figure S2 cESCs was induced into embryoid bodies by RA.** A. The number of EBs during induction. (Data are shown as mean  $\pm$  SEM, n = 3 independent experiments, \*\*  $p < 0.01$ , \*  $p < 0.05$ , t test). B. qRT-PCR was used to detect the expression of marker genes of three germ layers *Pax6* (ectoderm), *Eomes* (mesoderm), *Viment* (endoderm) in ESCs, EBs, PGCs. (Data are shown as mean  $\pm$  SEM, n = 3 independent experiments, \*\*  $p < 0.01$ , \*  $p < 0.05$ , one-way ANOVA).

**Supplementary Figure S3 New factors can be used to optimize PGCs induction models *in vitro*.** A. Correlation analysis between ESCs and PGCs samples. B, C. PPI interaction was used to analyze the interaction between different signaling pathways. D-H. Heat maps were used to analyze the expression of key genes during PGCs formation in different signaling pathways.

**Supplementary Figure S4 New factors can be used to optimize PGCs induction models *in vitro*.** Control settings and gating strategy for flow cytometry. a-e. Forward scatter and side scatter measurements are used to pre-gate the measured cell populations, then side scatter height and width measurements are used to gate individual cells, "negative" (A-B) and "positive" (C-E) stained cell populations. The border between is distinguished by the unstained sample in Figure 5D.

**Supplementary Figure S5 Comparison of the migration efficiency between the isolated PGCs and the induced PGCLCs.** A. Detection of PKH67 in the gonads of the recipient chicken embryos injected with the isolated PGCs and the induced PGCLCs. Scale bar: 60 $\mu$ m. B. Statistics on the migration efficiency of the isolated PGCs and the induced PGCLCs.
