# Supplementary material for: The Establishment and Optimization of a Chicken Primordial Germ Cell Induction Model Using Small-Molecule Compounds
Source: MDPI journal article supplement (doi:10.3390/ani14020302), 2024-01-18
Supplement: s1 [file s1]

Supplementary Table S6 GO terms related to NOTCH signaling pathway

| Id         | Term                                                                          | pVal        | Gene                                           |
|------------|-------------------------------------------------------------------------------|-------------|------------------------------------------------|
| GO:0060853 | Notch signaling pathway involved in arterial endothelial cell fate commitment | 0           | DLL1                                           |
| GO:0035481 | positive regulation of Notch signaling pathway involved in heart induction    | 0           | MESP1                                          |
| GO:1902367 | negative regulation of Notch signaling pathway involved in somitogenesis      | 0           | NRARP                                          |
| GO:0007219 | Notch signaling pathway                                                       | 4.13E-05    | AGXT; APP; ASCL1; CDH6; CDKN1B (part)          |
| GO:0045746 | negative regulation of Notch signaling pathway                                | 0.007413254 | ARRDC1; BMP7; C22H8ORF4; CBFA2T2; CHAC1 (part) |
| GO:0008593 | regulation of Notch signaling pathway                                         | 0.010023702 | ASCL1; DTX1; LFNG; POSTN                       |
| GO:0005112 | Notch binding                                                                 | 0.022713872 | C22H8ORF4; CHAC1; DLL1; DLL4; DNER (part)      |
| GO:0035333 | Notch receptor processing, ligand-dependent                                   | 0.025542455 | DLL1; DLL4                                     |
| GO:0007220 | Notch receptor processing                                                     | 0.053782414 | DLL1; DLL4; DNER; PSEN2                        |
| GO:0061314 | Notch signaling involved in heart development                                 | 0.20915181  | DLL4                                           |
| GO:0045747 | positive regulation of Notch signaling pathway                                | 0.21077859  | ASCL1; DLL1; DLL4; HES5; JAG2 (part)           |
| GO:0007221 | positive regulation of transcription of Notch receptor target                 | 0.733851748 | PLXND1                                         |
