# Supplementary material for: The Establishment and Optimization of a Chicken Primordial Germ Cell Induction Model Using Small-Molecule Compounds
Source: MDPI journal article supplement (doi:10.3390/ani14020302), 2024-01-18
Supplement: s1 [file s1]

Supplementary Table S1 GO terms related to stem cell differentiation

| Id         | Term                                                                | pVal        | Gene                                                |
|------------|---------------------------------------------------------------------|-------------|-----------------------------------------------------|
| GO:2000736 | regulation of stem cell differentiation                             | 0           | GDNF                                                |
| GO:0048866 | stem cell fate specification                                        | 0           | SOX17                                               |
| GO:2000741 | positive regulation of mesenchymal stem cell differentiation        | 0           | SOX5; SOX9                                          |
| GO:1902459 | positive regulation of stem cell population maintenance             | 0.000651441 | ESRRB;<br>LOC101748883;<br>NANOG;<br>PRDM14; Pou5f3 |
| GO:2000737 | negative regulation of stem cell differentiation                    | 0.003812373 | ESRRB; H1FOO;<br>HES5(part)                         |
| GO:2000035 | regulation of stem cell division                                    | 0.025542455 | ESRRB; SOX17                                        |
| GO:2000647 | negative regulation of stem cell proliferation                      | 0.025542455 | KDF1; OVOL2                                         |
| GO:1902455 | negative regulation of stem cell population maintenance             | 0.025542455 | LOXL2; WNT9B                                        |
| GO:0048103 | somatic stem cell division                                          | 0.025542455 | TGFB2; ZFP36L2<br>A2M; GPM6A;                       |
| GO:0048863 | stem cell differentiation                                           | 0.045055186 | HOXA7; LIF;<br>LOC107053919<br>(part)               |
| GO:0060218 | hematopoietic stem cell differentiation                             | 0.066187626 | BATF; CHD2;<br>MEOX1<br>DLL1; HES5;                 |
| GO:0097150 | neuronal stem cell population maintenance                           | 0.072138059 | LOC107057363;<br>LOC419390;<br>MMP24                |
| GO:0048864 | stem cell development                                               | 0.086745573 | FGF2                                                |
| GO:0072038 | mesenchymal stem cell maintenance involved in nephron morphogenesis | 0.086745573 | WNT9B                                               |
| GO:1902035 | positive regulation of hematopoietic stem cell proliferation        | 0.155908611 | KITLG; PDCD2                                        |
| GO:0017145 | stem cell division                                                  | 0.18427156  | ESRRB; GNL3;<br>RGS10                               |
| GO:0005173 | stem cell factor receptor binding                                   | 0.20915181  | KITLG                                               |
| GO:0072091 | regulation of stem cell proliferation                               | 0.20915181  | SOX17                                               |
| GO:0072089 | stem cell proliferation                                             | 0.245629596 | FGF2; TRIM71<br>CUL4A; SALL1;                       |
| GO:0035019 | somatic stem cell population maintenance                            | 0.315177703 | SALL4; SOX2;<br>SOX9 (part)                         |
| GO:0071425 | hematopoietic stem cell proliferation                               | 0.340581553 | CD34; MECOM                                         |
| GO:0019827 | stem cell population maintenance                                    | 0.664602719 | EOMES; ESRRB;<br>GNL3; LIF (part)                   |
