# Supplementary material for: The Establishment and Optimization of a Chicken Primordial Germ Cell Induction Model Using Small-Molecule Compounds
Source: MDPI journal article supplement (doi:10.3390/ani14020302), 2024-01-18
Supplement: s1 [file s1]

Supplementary Table S7 KEGG signaling pathway enrichment analysis

| Term                                            | pVal        | Gene                                             |
|-------------------------------------------------|-------------|--------------------------------------------------|
| MAPK signaling pathway                          | 5.20E-05    | CACNG4; TGFBR1; PDGFB;<br>CACNA1B; DUSP1 (part)  |
| TGF-beta signaling pathway                      | 0.040321389 | NOG; THBS1; TGFBR1; ID4; CDKN2B<br>(part)        |
| Wnt signaling pathway                           | 0.006078829 | FZD10; FZD4; FZD8; FZD2; FZD1<br>(part)          |
| Notch signaling pathway                         | 0.102007686 | PSEN2; KAT2A; NOTCH1; LFNG; DLL1<br>(part)       |
| Retinol metabolism                              | 0.002039991 | ALDH1A1; BCO1; ALDH1A2; ADH6;<br>CYP1A2 (part)   |
| PPAR signaling pathway                          | 0.069521894 | PPARD; SCD; RXRG; FABP7; PCK1<br>(part)          |
| Hedgehog signaling pathway                      | 0.273357314 | SHH; IHH; PTCH1; GLI2; BCL2 (part)               |
| ECM-receptor interaction                        | 1.36E-09    | LAMB2; THBS1; ITGB3; COL2A1;<br>ITGB5 (part)     |
| Cell adhesion molecules (CAMs)                  | 2.45E-06    | CLDN5; CLDN3; CDH5; SDC2; PTPRC<br>(part)        |
| D-Arginine and D-ornithine<br>metabolism        | 0           | DAO                                              |
| Drug metabolism - cytochrome P450               | 1.31E-06    | FMO3; ALDH1A3; GSTA4L; HPGDS;<br>ADH6 (part)     |
| Cell adhesion molecules (CAMs)                  | 2.45E-06    | CLDN5; CLDN3; CDH5; SDC2; PTPRC<br>(part)        |
| Metabolism of xenobiotics by<br>cytochrome P450 | 2.79E-06    | ALDH1A3; GSTA4L; HPGDS; ADH6;<br>CYP1A2 (part)   |
| Glycine, serine and threonine<br>metabolism     | 5.22E-06    | GLDC; GATM; CHDH; DMGDH; BHMT<br>(part)          |
| Focal adhesion                                  | 7.01E-06    | ACTN1; VAV3; LAMB2; THBS1; PDGFB<br>(part)       |
| Cytokine-cytokine receptor interaction          | 5.49E-05    | MSTN; TGFBR1; IL1RL1; TNFSF13B;<br>IL16 (part)   |
| Tryptophan metabolism                           | 9.18E-05    | CYP1A2; CYP1A1; AANAT; IL4I1;<br>CCBL1 (part)    |
| Calcium signaling pathway                       | 0.000103374 | EDNRA; EDNRB2; CACNA1B;<br>CAMK2A; ATP2B1 (part) |
| Alanine, aspartate and glutamate<br>metabolism  | 0.000132595 | GAD2; GLUL; ASL1; ADSL; GPT2 (part)              |
| Histidine metabolism                            | 0.000343751 | HAL; ALDH1A3; FTCD; UROC1; ASPA<br>(part)        |
| Tyrosine metabolism                             | 0.000492853 | ALDH1A3; DBH; TH; DCT; ADH6 (part)               |
| Butanoate metabolism                            | 0.00059007  | GAD2; ABAT; HMGCLL1; BDH2;<br>L2HGDH (part)      |

|                                            |             |                                               |
|--------------------------------------------|-------------|-----------------------------------------------|
| Nicotinate and nicotinamide<br>metabolism  | 0.000602677 | NT5M; NT5E; NT5C1B; CD38; BST1<br>(part)      |
| Neuroactive ligand-receptor<br>interaction | 0.000699741 | EDNRA; EDNRB2; CRHR1; CHRNA3;<br>P2RX1 (part) |
| Caffeine metabolism                        | 0.001967802 | XDH; PNAT10; NAT; PNAT3                       |

---
