# Supplementary material for: The Establishment and Optimization of a Chicken Primordial Germ Cell Induction Model Using Small-Molecule Compounds
Source: MDPI journal article supplement (doi:10.3390/ani14020302), 2024-01-18
Supplement: s1 [file s1]

Supplementary Table S3 GO terms related to cell migration

| Id         | Term                                                                                                               | pVal | Gene                                |
|------------|--------------------------------------------------------------------------------------------------------------------|------|-------------------------------------|
| GO:0061855 | negative regulation of neuroblast migration                                                                        | 0    | ABCC8                               |
| GO:1905322 | positive regulation of mesenchymal stem cell migration                                                             | 0    | ACKR3                               |
| GO:0061870 | positive regulation of hepatic stellate cell migration                                                             | 0    | ACTA2                               |
| GO:2000415 | positive regulation of fibronectin-dependent thymocyte migration                                                   | 0    | ADAM8                               |
| GO:2000418 | positive regulation of eosinophil migration                                                                        | 0    | ADAM8                               |
| GO:0021801 | cerebral cortex radial glia guided migration                                                                       | 0    | ADGRG1                              |
| GO:0043615 | astrocyte cell migration                                                                                           | 0    | APCDD1;<br>CCAH221;<br>CCL17; CCL18 |
| GO:0061580 | colon epithelial cell migration                                                                                    | 0    | ARSB                                |
| GO:0021853 | cerebral cortex GABAergic interneuron migration                                                                    | 0    | ARX; LHX6                           |
| GO:1905312 | positive regulation of cardiac neural crest cell migration involved in outflow tract morphogenesis                 | 0    | BMP7                                |
| GO:2000473 | positive regulation of hematopoietic stem cell migration                                                           | 0    | CCR2                                |
| GO:0035691 | macrophage migration inhibitory factor signaling pathway                                                           | 0    | CD74                                |
| GO:0035692 | macrophage migration inhibitory factor receptor complex                                                            | 0    | CD74                                |
| GO:0099606 | microtubule plus-end directed mitotic chromosome migration                                                         | 0    | CENPE                               |
| GO:1904141 | positive regulation of microglial cell migration                                                                   | 0    | CSF1                                |
| GO:0021813 | cell-cell adhesion involved in neuronal-glia interactions involved in cerebral cortex radial glia guided migration | 0    | DAB1                                |
| GO:0097477 | lateral motor column neuron migration                                                                              | 0    | DAB1; LHX1                          |
| GO:0003273 | cell migration involved in endocardial cushion formation                                                           | 0    | DCHS1                               |
| GO:0036336 | dendritic cell migration                                                                                           | 0    | DOCK8; EPS8                         |
| GO:0021885 | forebrain cell migration                                                                                           | 0    | EMX2                                |
| GO:0003345 | proepicardium cell migration involved in pericardium morphogenesis                                                 | 0    | FLRT3                               |
| GO:0003147 | neural crest cell migration involved in heart formation                                                            | 0    | FOLR1                               |
| GO:0003253 | cardiac neural crest cell migration involved in outflow tract morphogenesis                                        | 0    | FOLR1; HAND2                        |
| GO:0021855 | hypothalamus cell migration                                                                                        | 0    | FOXB1                               |

|            |                                                                                                                                 |             |                                                                |
|------------|---------------------------------------------------------------------------------------------------------------------------------|-------------|----------------------------------------------------------------|
| GO:0061381 | cell migration in diencephalon                                                                                                  | 0           | FOXB1                                                          |
| GO:0097241 | hematopoietic stem cell migration to bone marrow                                                                                | 0           | GAS6; GPLD1                                                    |
| GO:0071674 | mononuclear cell migration                                                                                                      | 0           | LGALS3                                                         |
| GO:0071677 | positive regulation of mononuclear cell migration                                                                               | 0           | LGALS3                                                         |
| GO:2000403 | positive regulation of lymphocyte migration                                                                                     | 0           | MADCAM1                                                        |
| GO:1905517 | macrophage migration                                                                                                            | 0           | MCOLN2                                                         |
| GO:0003259 | cardioblast anterior-lateral migration                                                                                          | 0           | MESP1                                                          |
| GO:0060975 | cardioblast migration to the midline involved in heart field formation                                                          | 0           | MESP1                                                          |
| GO:0022035 | rhombomere cell migration                                                                                                       | 0           | NRP1                                                           |
| GO:1904139 | regulation of microglial cell migration                                                                                         | 0           | P2RY12                                                         |
| GO:0035793 | positive regulation of metanephric mesenchymal cell migration by platelet-derived growth factor receptor-beta signaling pathway | 0           | PDGFA; PDGFB                                                   |
| GO:2000591 | positive regulation of metanephric mesenchymal cell migration                                                                   | 0           | PDGFB                                                          |
| GO:0021934 | hindbrain tangential cell migration                                                                                             | 0           | PHOX2B                                                         |
| GO:1901166 | neural crest cell migration involved in autonomic nervous system development                                                    | 0           | PHOX2B;<br>SEMA3F                                              |
| GO:0036486 | ventral trunk neural crest cell migration                                                                                       | 0           | SEMA3F<br>ADRA2A;<br>ATP8A1;                                   |
| GO:0030335 | positive regulation of cell migration                                                                                           | 9.78E-06    | CCAH221;<br>CCL17; CCL18<br>(part)<br>ANXA6; ERBB4;            |
| GO:0001755 | neural crest cell migration                                                                                                     | 3.11E-05    | GDNF; ISL1;<br>KITLG (part)<br>ACVRL1;                         |
| GO:0010596 | negative regulation of endothelial cell migration                                                                               | 0.003495186 | ADAMTS9; DLL4;<br>LOC100858919;<br>NR2F2 (part)<br>BCL2; CCL5; |
| GO:0014911 | positive regulation of smooth muscle cell migration                                                                             | 0.003766026 | PDGFB; POSTN;<br>SEMA6D (part)<br>ABHD2; ABHD6;<br>ACVRL1;     |
| GO:0030336 | negative regulation of cell migration                                                                                           | 0.003866281 | ADARB1; ARAP3<br>(part)                                        |
| GO:0010595 | positive regulation of endothelial cell migration                                                                               | 0.00432758  | ADGRA2;<br>ATOH8; CCBE1;                                       |

|            |                                                                   |             |                                                           |
|------------|-------------------------------------------------------------------|-------------|-----------------------------------------------------------|
|            |                                                                   |             | FGF2; GATA3<br>(part)                                     |
| GO:0021800 | cerebral cortex tangential migration                              | 0.007519789 | ARX; LHX6;<br>RELN                                        |
| GO:0002687 | positive regulation of leukocyte migration                        | 0.010023702 | ITGA2B; KITLG;<br>MADCAM1;<br>TNFRSF18<br>ADGRA2;         |
| GO:0043542 | endothelial cell migration                                        | 0.016208055 | CDH13; FAP;<br>LOXL2;<br>PLEKHG5 (part)<br>ADGRL3; ASCL1; |
| GO:0001764 | neuron migration                                                  | 0.022019035 | AUTS2; CCK;<br>CDK5R2 (part)<br>CX3CR1;                   |
| GO:0021795 | cerebral cortex cell migration                                    | 0.023045816 | EFHC1; EGFR;<br>FGF13; PEX13                              |
| GO:0072676 | lymphocyte migration                                              | 0.025542455 | GATA3; TBX21                                              |
| GO:1902766 | skeletal muscle satellite cell migration                          | 0.025542455 | RHOC; SDC4                                                |
| GO:0043534 | blood vessel endothelial cell migration                           | 0.026558105 | ADAM8; PTK2B;<br>SCARB1; VHL                              |
| GO:0008347 | glial cell migration                                              | 0.026558105 | CSPG4; NKX2-2;<br>P2RY12; TGFB2                           |
| GO:0002042 | cell migration involved in sprouting<br>angiogenesis              | 0.02874501  | EFNB2; EGR3;<br>GPLD1                                     |
| GO:0006929 | substrate-dependent cell migration                                | 0.02874501  | FMNL1; PDGFB;<br>VEGFC                                    |
| GO:0014912 | negative regulation of smooth muscle cell<br>migration            | 0.02874501  | IGFBP3;<br>SEMA6D; TRIB1                                  |
| GO:0072678 | T cell migration                                                  | 0.02874501  | LOC107049666;<br>MYO1G; S1PR1<br>ACVRL1;                  |
| GO:0043537 | negative regulation of blood vessel<br>endothelial cell migration | 0.053782414 | AGTR2; RGCCCL;<br>VASH1                                   |
| GO:2000406 | positive regulation of T cell migration                           | 0.066187626 | ADAM8; APP;<br>DOCK8<br>ADGRG1;                           |
| GO:2001223 | negative regulation of neuron migration                           | 0.066187626 | ERBB4;<br>KIAA2022                                        |
| GO:0042074 | cell migration involved in gastrulation                           | 0.066187626 | CER1; SOX17;<br>WNT11B                                    |
| GO:0021799 | cerebral cortex radially oriented cell<br>migration               | 0.066187626 | DIXDC1; LHX6;<br>POU3F2                                   |

---

|            |                                                                         |             |                                                   |
|------------|-------------------------------------------------------------------------|-------------|---------------------------------------------------|
| GO:1904754 | positive regulation of vascular associated smooth muscle cell migration | 0.072138059 | DOCK4;<br>IQGAP3;<br>PDGFB; SSH1;<br>XBP1         |
| GO:2001222 | regulation of neuron migration                                          | 0.072138059 | FLRT2; IGSF10;<br>SCRT2; SOX14;<br>UNC5D          |
| GO:0002523 | leukocyte migration involved in inflammatory response                   | 0.07961045  | ADAM8; JAM3                                       |
| GO:0010594 | regulation of endothelial cell migration                                | 0.07961045  | BMPER;<br>LOC112530215                            |
| GO:0051549 | positive regulation of keratinocyte migration                           | 0.07961045  | FGF7; HBEGF                                       |
| GO:0010631 | epithelial cell migration                                               | 0.07961045  | NANOS1; PKN3                                      |
| GO:1901164 | negative regulation of trophoblast cell migration                       | 0.086745573 | ARHGDI3                                           |
| GO:0021831 | embryonic olfactory bulb interneuron precursor migration                | 0.086745573 | ARX                                               |
| GO:0090132 | epithelium migration                                                    | 0.086745573 | BVES                                              |
| GO:2000417 | negative regulation of eosinophil migration                             | 0.086745573 | CD300LG                                           |
| GO:0035718 | macrophage migration inhibitory factor binding                          | 0.086745573 | CD74                                              |
| GO:0006931 | substrate-dependent cell migration, cell attachment to substrate        | 0.086745573 | CUZD1                                             |
| GO:0051548 | negative regulation of keratinocyte migration                           | 0.086745573 | EPPKL                                             |
| GO:0051546 | keratinocyte migration                                                  | 0.086745573 | FERMT1                                            |
| GO:0022029 | telencephalon cell migration                                            | 0.086745573 | FOXB1                                             |
| GO:0035701 | hematopoietic stem cell migration                                       | 0.086745573 | GPLD1                                             |
| GO:0002686 | negative regulation of leukocyte migration                              | 0.086745573 | HOXA7                                             |
| GO:0003366 | cell-matrix adhesion involved in amoeboid cell migration                | 0.086745573 | LOC107049666                                      |
| GO:0035046 | pronuclear migration                                                    | 0.086745573 | LRMP                                              |
| GO:0008078 | mesodermal cell migration                                               | 0.086745573 | MESP1                                             |
| GO:0022028 | tangential migration from the subventricular zone to the olfactory bulb | 0.086745573 | SLIT1                                             |
| GO:0097324 | melanocyte migration                                                    | 0.086745573 | ZEB2                                              |
| GO:0016477 | cell migration                                                          | 0.111115651 | ADAMTS12;<br>ADGRG1; ARC;<br>ASAP3; BLK<br>(part) |
| GO:0010634 | positive regulation of epithelial cell migration                        | 0.138713148 | CTSH; DOCK1;<br>GLIPR2; PPM1F;<br>PRKCE (part)    |

---

|            |                                                                             |             |                                                |
|------------|-----------------------------------------------------------------------------|-------------|------------------------------------------------|
| GO:0010633 | negative regulation of epithelial cell migration                            | 0.141001458 | MARVELD3;<br>PBLD; PTPN23;<br>PTPRR            |
| GO:0050900 | leukocyte migration                                                         | 0.144300037 | ADD2; CD244;<br>CD34; CD48;<br>CD74 (part)     |
| GO:0030334 | regulation of cell migration                                                | 0.144300037 | CCR2; DOCK10;<br>ERBB4; FRMD5;<br>LAMA2 (part) |
| GO:0090131 | mesenchyme migration                                                        | 0.155908611 | ACTA2; ACTG2                                   |
| GO:0051451 | myoblast migration                                                          | 0.155908611 | MEGF10; SIX4                                   |
| GO:2000405 | negative regulation of T cell migration                                     | 0.20915181  | APOD                                           |
| GO:0060973 | cell migration involved in heart development                                | 0.20915181  | BVES                                           |
| GO:1990266 | neutrophil migration                                                        | 0.20915181  | MCOLN2                                         |
| GO:0014910 | regulation of smooth muscle cell migration                                  | 0.20915181  | PDGFA                                          |
| GO:0021942 | radial glia guided migration of Purkinje cell                               | 0.245629596 | CTNNA2; DAB1                                   |
| GO:0043536 | positive regulation of blood vessel<br>endothelial cell migration           | 0.262014859 | PDGFB;<br>TMSB4X;<br>TMSB4Y; VEGFC             |
| GO:0090051 | negative regulation of cell migration involved<br>in sprouting angiogenesis | 0.33587616  | DLL4; KLF4;<br>MEOX2                           |
| GO:0010762 | regulation of fibroblast migration                                          | 0.33587616  | PRR5L; RFFL;<br>SDC4                           |
| GO:0010632 | regulation of epithelial cell migration                                     | 0.338693169 | ARSB                                           |
| GO:0001667 | ameboidal-type cell migration                                               | 0.338693169 | CAP1                                           |
| GO:0010764 | negative regulation of fibroblast migration                                 | 0.338693169 | CYGB                                           |
| GO:0006930 | substrate-dependent cell migration, cell<br>extension                       | 0.338693169 | P2RY12                                         |
| GO:0010763 | positive regulation of fibroblast migration                                 | 0.434367549 | DDR2; PRKCE                                    |
| GO:0090050 | positive regulation of cell migration involved<br>in sprouting angiogenesis | 0.460549541 | HDAC9                                          |
| GO:0022027 | interkinetic nuclear migration                                              | 0.460549541 | KIF1A                                          |
| GO:1901165 | positive regulation of trophoblast cell<br>migration                        | 0.460549541 | SYDE1                                          |
| GO:0010761 | fibroblast migration                                                        | 0.460549541 | ZFAND5                                         |
| GO:0007097 | nuclear migration                                                           | 0.673170094 | FHOD1; SLIT1                                   |
| GO:2001224 | positive regulation of neuron migration                                     | 0.687118776 | IL1R1; IL1RL2;<br>SEMA3A                       |

---
