# Supplementary material for: The Establishment and Optimization of a Chicken Primordial Germ Cell Induction Model Using Small-Molecule Compounds
Source: MDPI journal article supplement (doi:10.3390/ani14020302), 2024-01-18
Supplement: s1 [file s1]

Supplementary Table S10 qRT-PCR primers sequence of related genes

| Gene                            | F (5'-3')            | R (5'-3')             |
|---------------------------------|----------------------|-----------------------|
| <i><math>\beta</math>-actin</i> | ACCGCAAATGCTTCTAAAC  | GACTGCTGCTGACACCTTC   |
| <i>Nanog</i>                    | GTATGCAACCAGCTCACC   | TAGTAGTGTCGCGACCTAAC  |
| <i>Lin28</i>                    | CCCCAGCCTTGCCCTTTATT | CGTCATTACGCACATCCTA   |
| <i>Sox2</i>                     | CATATGTAAGACAAAGGGG  | AAGGTCCAGAATTTCTAATAA |
| <i>Oct4</i>                     | AAACGCAGGACCAGCATCG  | AGCAGCCGCTTGCCCTTTCT  |
| <i>Pax6</i>                     | CCGACGGGATGTACGACAAG | CATCTGGGCCTCATCGGAAT  |
| <i>Eomes</i>                    | ACAACGGTGAGAGAACCGTC | CTGCTGCACAGGAGTAACGA  |
| <i>Vimentin</i>                 | GGACCTGCTGAATGTAAAGA | AGGTTGGAATAGGCATGTTA  |
| <i>Blimp1</i>                   | AAGAATCTGGTGAAAGGGAG | GCAGTTTGATGCGTATT     |
| <i>Dazl</i>                     | TACCCATTCGTCAACAACC  | CACCTCCTTCACAGTACCATA |
| <i>Cxcr4</i>                    | ACTTGTCTTGCCTGGTCTA  | TGATGCCAATGTAATACGG   |
| <i>Sox17</i>                    | CGCTGCCCCGCTATGATGCC | GCCGCTTGCGCTCGTCCTT   |
| <i>Cvh</i>                      | AGCACAGGTGGTGAACGAA  | TGCTGGTGGATGGTAGGTT   |
