# Supplementary material for: The Establishment and Optimization of a Chicken Primordial Germ Cell Induction Model Using Small-Molecule Compounds
Source: MDPI journal article supplement (doi:10.3390/ani14020302), 2024-01-18
Supplement: s1 [file s1]

Supplementary Table S8 GO terms related to MAPK signaling pathway

| Id         | Term                                                                                         | pVal     | Gene                                              |
|------------|----------------------------------------------------------------------------------------------|----------|---------------------------------------------------|
| GO:0090080 | positive regulation of MAPKKK cascade by fibroblast growth factor receptor signaling pathway | 0        | KLB                                               |
| GO:0043408 | regulation of MAPK cascade                                                                   | 0.002247 | BMP4; BMP6; BMP7; C2orf88 (part)                  |
| GO:1900745 | positive regulation of p38MAPK cascade                                                       | 0.008385 | GADD45G; GDF6; GDF7; HAND2; MAPKKK3L; NCF1; SASH1 |
| GO:1903753 | negative regulation of p38MAPK cascade                                                       | 0.086746 | EZR                                               |
| GO:0043410 | positive regulation of MAPK cascade                                                          | 0.103072 | ADRB2; C1QTNF6; CCR2; CD74 (part)                 |
| GO:0000165 | MAPK cascade                                                                                 | 0.124402 | CCAH221; CCL5; CCL17; CCL18; CCR5 (part)          |
| GO:0032874 | positive regulation of stress-activated MAPK cascade                                         | 0.154273 | C26H1orf106; CARD9; MID1; STK25; TGFB2            |
| GO:1900744 | regulation of p38MAPK cascade                                                                | 0.209152 | HGF                                               |
| GO:0000188 | inactivation of MAPK activity                                                                | 0.24563  | DUSP4; DUSP8                                      |
| GO:0000185 | activation of MAPKKK activity                                                                | 0.338693 | GADD45G                                           |
| GO:0000187 | activation of MAPK activity                                                                  | 0.535128 | C26H1orf106; CD74; CD81; CSPG4 (part)             |
| GO:0000186 | activation of MAPKK activity                                                                 | 0.592304 | EGFR; FGF2; MAP3K13; MAP3K15                      |
| GO:0043409 | negative regulation of MAPK cascade                                                          | 0.67317  | ASH1L; DAG1                                       |
| GO:0071848 | positive regulation of ERK1 and ERK2 cascade via TNFSF11-mediated signaling                  | 0        | TNFRSF11A; TNFSF11                                |
| GO:0070374 | positive regulation of ERK1 and ERK2 cascade                                                 | 5.53E-05 | ACKR3; ACTA2; APP; ARHGAP8; BMPER (part)          |
| GO:0070373 | negative regulation of ERK1 and ERK2 cascade                                                 | 0.037334 | CNKSRR3; DUSP4; EZR; GPER1; KLF4 (part)           |
| GO:0070371 | ERK1 and ERK2 cascade                                                                        | 0.053782 | CTSH; SOX9; TNFSF11; ZFP36L2                      |
| GO:0070372 | regulation of ERK1 and ERK2 cascade                                                          | 0.085533 | CYR61; EGFR; EPHA7; IL1B; ROS1; SYK               |
