# Supplementary material for: The Establishment and Optimization of a Chicken Primordial Germ Cell Induction Model Using Small-Molecule Compounds
Source: MDPI journal article supplement (doi:10.3390/ani14020302), 2024-01-18
Supplement: s1 [file s1]

Supplementary Table S4 GO terms related to Wnt signaling pathway

| Id         | Term                                                                                             | pVal        | Gene                                        |
|------------|--------------------------------------------------------------------------------------------------|-------------|---------------------------------------------|
| GO:0021881 | Wnt-activated signaling pathway involved in forebrain neuron fate commitment                     | 0           | AXIN1                                       |
| GO:0060823 | canonical Wnt signaling pathway involved in neural plate anterior/posterior pattern formation    | 0           | AXIN1                                       |
| GO:0061290 | canonical Wnt signaling pathway involved in metanephric kidney development                       | 0           | GATA3; LGR4                                 |
| GO:2000057 | negative regulation of Wnt signaling pathway involved in digestive tract morphogenesis           | 0           | LOC395991;<br>LOC417741;<br>SFRP5           |
| GO:0090082 | positive regulation of heart induction by negative regulation of canonical Wnt signaling pathway | 0           | MESP1                                       |
| GO:1901231 | positive regulation of non-canonical Wnt signaling pathway via JNK cascade                       | 0           | NKD1                                        |
| GO:2000054 | negative regulation of Wnt signaling pathway involved in dorsal/ventral axis specification       | 0           | SOST                                        |
| GO:0003308 | negative regulation of Wnt signaling pathway involved in heart development                       | 0           | SOX17                                       |
| GO:0045813 | positive regulation of Wnt signaling pathway, calcium modulating pathway                         | 0           | VANGL2                                      |
| GO:1905438 | non-canonical Wnt signaling pathway involved in midbrain dopaminergic neuron differentiation     | 0           | WNT9B                                       |
| GO:0017147 | Wnt-protein binding                                                                              | 0.000571801 | APCDD1; EGF;<br>FZD1; FZD10;<br>FZD2 (part) |
| GO:0042813 | Wnt-activated receptor activity                                                                  | 0.003601693 | EGF; FZD1;<br>FZD10; FZD2;<br>FZD4 (part)   |
| GO:0035567 | non-canonical Wnt signaling pathway                                                              | 0.006150084 | FZD1; FZD10;<br>FZD2; FZD4;<br>FZD5 (part)  |
| GO:0060070 | canonical Wnt signaling pathway                                                                  | 0.006434904 | DIXDC1; DVL1;<br>EGF; FZD1;<br>FZD10 (part) |

|            |                                                                                         |             |                                                                |
|------------|-----------------------------------------------------------------------------------------|-------------|----------------------------------------------------------------|
| GO:2000096 | positive regulation of Wnt signaling pathway,<br>planar cell polarity pathway           | 0.025542455 | ANKRD6; NKD1                                                   |
| GO:1905426 | positive regulation of Wnt-mediated midbrain<br>dopaminergic neuron differentiation     | 0.025542455 | LMX1A;<br>LOC101750514                                         |
| GO:0061357 | positive regulation of Wnt protein secretion                                            | 0.025542455 | PTPN23; WLS<br>DCDC2; FOXL1;                                   |
| GO:0030111 | regulation of Wnt signaling pathway                                                     | 0.043404862 | HNF1B; MDFIC;<br>VANGL2<br>APCDD1;<br>BARX1; DKK2;             |
| GO:0030178 | negative regulation of Wnt signaling pathway                                            | 0.056938029 | LOC395991;<br>LOC417741<br>(part)                              |
| GO:0044332 | Wnt signaling pathway involved in<br>dorsal/ventral axis specification                  | 0.07961045  | EGF; FZD5                                                      |
| GO:2000052 | positive regulation of non-canonical Wnt<br>signaling pathway                           | 0.07961045  | LOC112532128;<br>RSPO3                                         |
| GO:0044336 | canonical Wnt signaling pathway involved in<br>negative regulation of apoptotic process | 0.07961045  | MITF; TCF7                                                     |
| GO:0038031 | non-canonical Wnt signaling pathway via<br>JNK cascade                                  | 0.086745573 | MYOC                                                           |
| GO:0060828 | regulation of canonical Wnt signaling<br>pathway                                        | 0.129047475 | AMER2;<br>ANKRD10;<br>FOLR1; FZD5;<br>KREMEN1 (part)<br>AMER2; |
| GO:0090090 | negative regulation of canonical Wnt<br>signaling pathway                               | 0.132146928 | ANKRD6; BICC1;<br>DKK2; DRAXIN<br>(part)<br>ATP6V1C2;          |
| GO:0030177 | positive regulation of Wnt signaling pathway                                            | 0.134733205 | DVL1; SALL1;<br>SULF1; SULF2<br>(part)                         |
| GO:0007223 | Wnt signaling pathway, calcium modulating<br>pathway                                    | 0.198387624 | FZD4; FZD5;<br>LEF1; NFATC1                                    |
| GO:2000051 | negative regulation of non-canonical Wnt<br>signaling pathway                           | 0.20915181  | SFRP4                                                          |

---

|            |                                                                                     |             |               |
|------------|-------------------------------------------------------------------------------------|-------------|---------------|
| GO:1904929 | coreceptor activity involved in Wnt signaling pathway, planar cell polarity pathway | 0.338693169 | PTK7          |
|            |                                                                                     |             | AMER2;        |
|            |                                                                                     |             | AMOTL2;       |
| GO:0016055 | Wnt signaling pathway                                                               | 0.456010391 | APCDD1;       |
|            |                                                                                     |             | CELSR2; CPE   |
|            |                                                                                     |             | (part)        |
| GO:1990909 | Wnt signalosome                                                                     | 0.460549541 | DVL1          |
|            |                                                                                     |             | CELSR2; DVL1; |
| GO:0060071 | Wnt signaling pathway, planar cell polarity pathway                                 | 0.495503889 | FZD5;         |
|            |                                                                                     |             | PRICKLE4;     |
|            |                                                                                     |             | VANGL2 (part) |
|            |                                                                                     |             | DIXDC1; DKK2; |
| GO:0090263 | positive regulation of canonical Wnt signaling pathway                              | 0.753019153 | DVL1; FAM53B; |
|            |                                                                                     |             | FGF2 (part)   |

---
