# Supplementary material for: The Establishment and Optimization of a Chicken Primordial Germ Cell Induction Model Using Small-Molecule Compounds
Source: MDPI journal article supplement (doi:10.3390/ani14020302), 2024-01-18
Supplement: s1 [file s1]

Supplementary Table S5 GO terms related to BMP signaling pathway

| Id         | Term                                                                       | pVal        | Gene                                                |
|------------|----------------------------------------------------------------------------|-------------|-----------------------------------------------------|
| GO:1902813 | negative regulation of BMP signaling                                       | 0           | CER1                                                |
|            | pathway involved in determination of lateral mesoderm left/right asymmetry |             |                                                     |
| GO:0071773 | cellular response to BMP stimulus                                          | 0.002013323 | ACVRL1;<br>ADAMTS12;<br>BMP6; BMP7;<br>GATA3 (part) |
| GO:0030509 | BMP signaling pathway                                                      | 0.002318165 | ACVRL1; BMP4;<br>BMP6; BMP7;<br>FAM83G (part)       |
| GO:0030510 | regulation of BMP signaling pathway                                        | 0.003409941 | LOC395991;<br>LOC417741;<br>SFRP4; SFRP5;<br>TFAP2B |
| GO:0070700 | BMP receptor binding                                                       | 0.007519789 | BMP4; BMP6;<br>BMP7                                 |
| GO:0030514 | negative regulation of BMP signaling pathway                               | 0.007829194 | BMPER; FSTL3;<br>HTRA1; HTRA3;<br>LRP2 (part)       |
| GO:0030513 | positive regulation of BMP signaling pathway                               | 0.018443913 | ACVRL1; CYR61;<br>FBXL15; GATA6;<br>HES5 (part)     |
| GO:0035582 | sequestering of BMP in extracellular matrix                                | 0.086745573 | CER1                                                |
| GO:0061312 | BMP signaling pathway involved in heart development                        | 0.20915181  | MSX2                                                |
| GO:0098821 | BMP receptor activity                                                      | 0.460549541 | ACVRL1                                              |
| GO:0036122 | BMP binding                                                                | 0.658980698 | CER1                                                |
