# Supplementary material for: The Establishment and Optimization of a Chicken Primordial Germ Cell Induction Model Using Small-Molecule Compounds
Source: MDPI journal article supplement (doi:10.3390/ani14020302), 2024-01-18
Supplement: s1 [file s1]

Supplementary Table S2 GO terms related to germ cell formation

| Id         | Term                                                                       | pVal        | Gene                          |
|------------|----------------------------------------------------------------------------|-------------|-------------------------------|
| GO:0002467 | germinal center formation                                                  | 0           | BCL6; KLHL6;<br>MEF2C         |
| GO:0001674 | female germ cell nucleus                                                   | 0           | LHX8                          |
| GO:0030718 | germ-line stem cell population maintenance                                 | 0           | LOC107049165;<br>PRDM14       |
| GO:2000255 | negative regulation of male germ cell<br>proliferation                     | 0.086745573 | HPGDS                         |
| GO:0035234 | ectopic germ cell programmed cell death                                    | 0.086745573 | KITLG                         |
| GO:0019100 | male germ-line sex determination                                           | 0.086745573 | SOX9                          |
| GO:0051729 | germline cell cycle switching, mitotic to<br>meiotic cell cycle            | 0.20915181  | LOC769510                     |
| GO:0002634 | regulation of germinal center formation                                    | 0.20915181  | MEF2C<br>DND1; NANOS3;        |
| GO:0007281 | germ cell development                                                      | 0.322301865 | PRDM14;<br>RGS10; TDRD1       |
| GO:0001704 | formation of primary germ layer                                            | 0.338693169 | ATOH8                         |
| GO:0001673 | male germ cell nucleus                                                     | 0.568009514 | TCFL5                         |
| GO:0097722 | sperm motility                                                             | 0           | ASH1L                         |
| GO:0004766 | spermidine synthase activity                                               | 0           | SRM                           |
| GO:0097227 | sperm annulus                                                              | 0.007519789 | SEPT12; SEPT2;<br>SEPT6       |
| GO:0097524 | sperm plasma membrane                                                      | 0.086745573 | ABHD2                         |
| GO:2000360 | negative regulation of binding of sperm to<br>zona pellucida               | 0.086745573 | ASTL                          |
| GO:1902093 | positive regulation of flagellated sperm<br>motility                       | 0.086745573 | PRDM14                        |
| GO:0035093 | spermatogenesis, exchange of chromosomal<br>proteins                       | 0.155908611 | PIWIL1; SYCP3<br>ABHD2; CFTR; |
| GO:0048240 | sperm capacitation                                                         | 0.198387624 | PCSK4;<br>SLC26A6             |
| GO:0008295 | spermidine biosynthetic process                                            | 0.20915181  | SRM                           |
| GO:0060468 | prevention of polyspermy                                                   | 0.338693169 | ASTL                          |
| GO:0007342 | fusion of sperm to egg plasma membrane<br>involved in single fertilization | 0.338693169 | CD9                           |
| GO:0048515 | spermatid differentiation                                                  | 0.460549541 | TMEM119                       |

|            |                                    |             |                                                                 |
|------------|------------------------------------|-------------|-----------------------------------------------------------------|
| GO:0030317 | flagellated sperm motility         | 0.495503889 | CELF3; DDX4;<br>DNAH5; INTS13;<br>LRRRC6 (part)                 |
| GO:0007286 | spermatid development              | 0.551623589 | CDYL; DHH;<br>JAM3; KLHL26;<br>KLHL32 (part)                    |
| GO:0007288 | sperm axoneme assembly             | 0.562343392 | NEURL1;<br>PROCA1; SPAG6                                        |
| GO:0007339 | binding of sperm to zona pellucida | 0.616679316 | FETUB; PCSK4;<br>ZP3; ZP3L1                                     |
| GO:0097228 | sperm principal piece              | 0.785508358 | DNAH8; SPAG6<br>ADAM28;                                         |
| GO:0007283 | spermatogenesis                    | 0.998093464 | ARID4B; ASZ1;<br>AZIN2; BCL6<br>(part)                          |
| GO:0036126 | sperm flagellum                    | 0.999658567 | ABHD2; AK1;<br>C6H10orf107;<br>DNAJB13;<br>HEATR7B2L1<br>(part) |
| GO:0097225 | sperm midpiece                     | 0.999976247 | HEATR7B2L1;<br>HEATR7B2L2;<br>(part)                            |

---
